# Supplementary material for: FeVO 4 -based solution-processed all oxide self-biased fast photodetectors
Source: Royal Society of Chemistry journal article supplement (doi:10.1039/d4tc01794c), 2024-01-01
Supplement: d4tc01794c2.pdf [file d4tc01794c2.pdf]

## Supporting Information

### FeVO<sub>4</sub>-based solution- processed all oxide self-biased fast photodetectors.

Parul Garg, Priya Kaith, Vishal Nagar, Ashok Bera\*

#### AFFILIATION

Department of Physics, Indian Institute of Technology Jammu, Jammu and Kashmir, 181221

India

Author to whom correspondence should be addressed: [ashok.bera@iitjammu.ac.in](mailto:ashok.bera@iitjammu.ac.in)

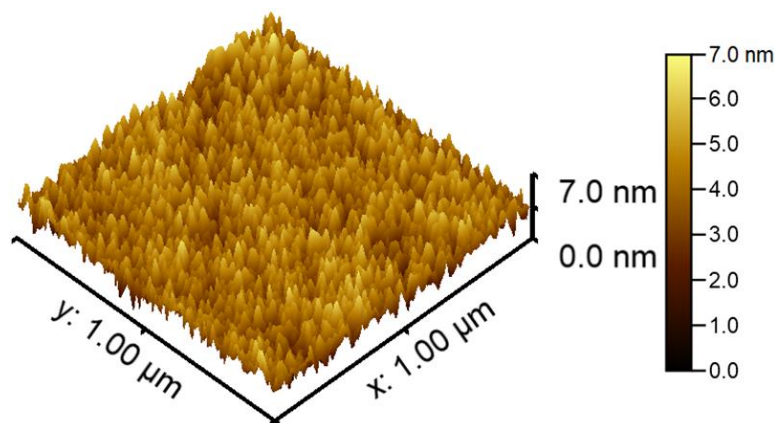

**FIG. S1.** Three-dimensional AFM image of FeVO<sub>4</sub> (FVO) thin film on a quartz substrate.

**Table S1.** Atomic percentages of the constituent elements in the solution-processed FVO thin films.

| Element name | Atomic (%) |
|--------------|------------|
| Fe           | 16.04      |
| V            | 15.09      |
| O            | 62.56      |
| C            | 6.31       |

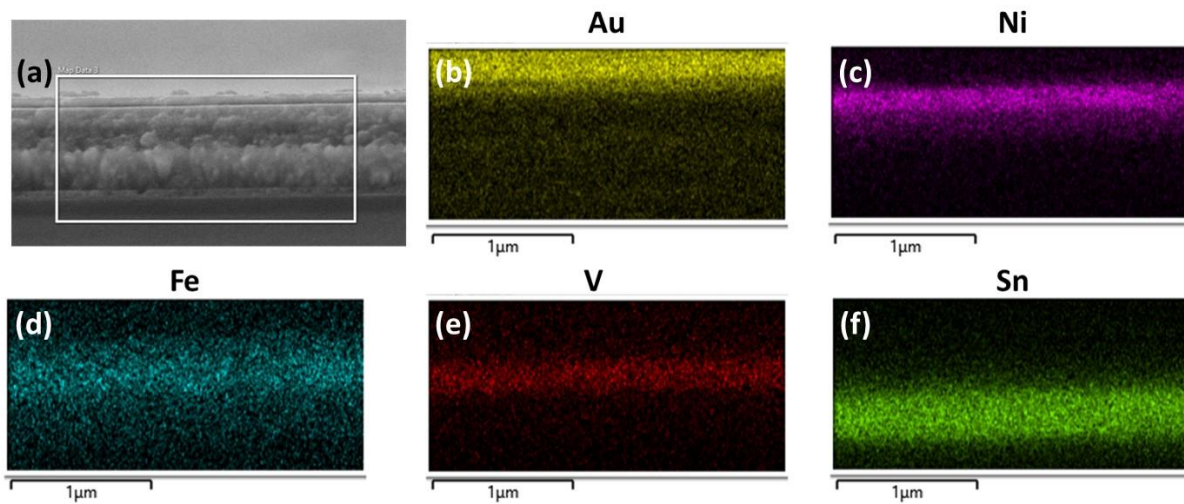

**FIG. S2.** (a) Cross-section FESEM image of FVO-based photodetector. Corresponding EDS elemental mapping graphs of (b) Au, (c) Ni, (d) Fe, (e) V and (f) Sn are present in the bottom FTO substrate.

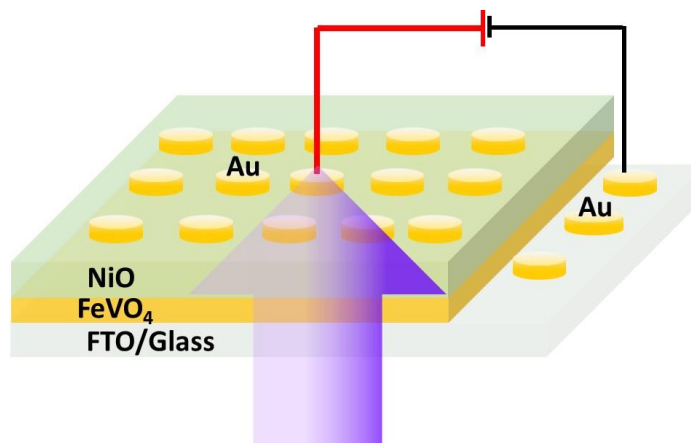

**FIG. S3.** The schematic of the electrical measurement for n-FVO/p-NiO photodetector.

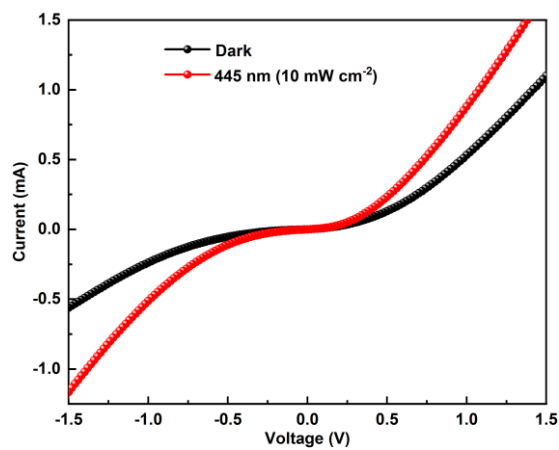

**FIG. S4.** *I-V* characteristics of the n-FVO/p-NiO heterojunction device under dark and visible light (445 nm, 10 mW cm<sup>-2</sup>).

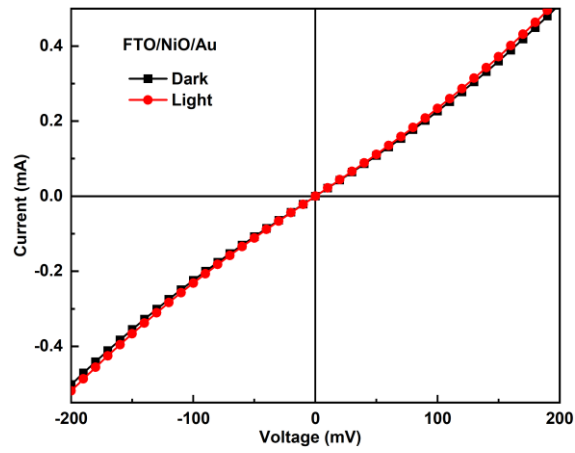

**Fig. S5.**  $I$ - $V$  characteristics of FTO/NiO/Au device under dark and 445 nm light illumination.

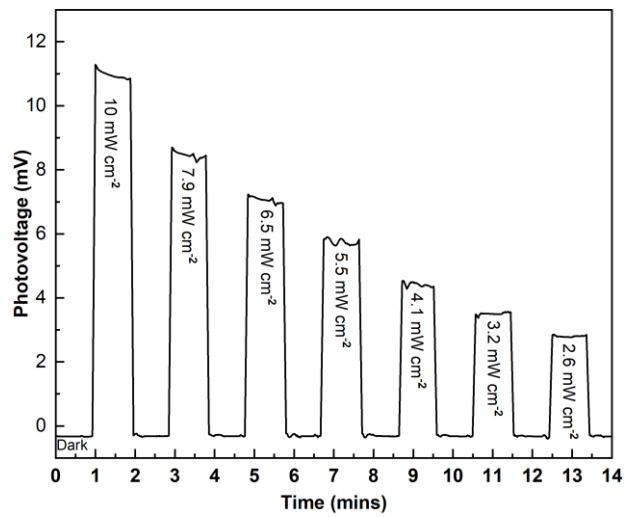

**Fig. S6.** The photovoltage-time curve with the change of incident light intensity.

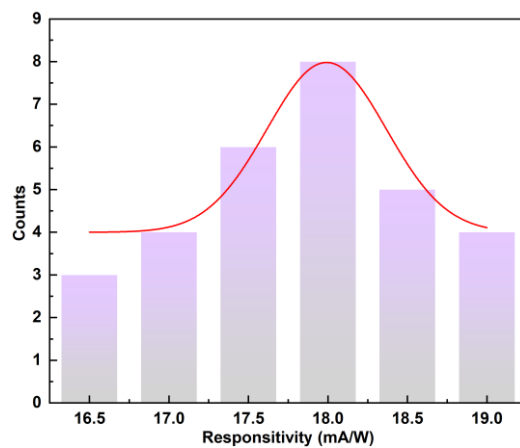

**Fig. S7.** Histogram showing the average responsivity ( $R$ ) extracted from the  $J$ - $V$  curves of 30 FVO-based photodetectors.

**Table S2.** Comparison diagram of representative solution-processed self-biased all-oxide photodetectors.

| Device                                               | Wavelength (nm) | Intensity (mW cm <sup>-2</sup> ) | Photoresponsivity (mA W <sup>-1</sup> ) | Detectivity (Jones)   | Rise time (ms) | Fall time (ms) | Ref.         |
|------------------------------------------------------|-----------------|----------------------------------|-----------------------------------------|-----------------------|----------------|----------------|--------------|
| BiFeO <sub>3</sub> /XTiO <sub>3</sub> (X-Sr, Zn, Pb) | 500             | 8                                | 1.3                                     | 3×10 <sup>10</sup>    | 19             | 23             | <sup>1</sup> |
| CuBi <sub>2</sub> O <sub>4</sub> /PZT                | 425             | 0.00751                          | 0.24                                    | 2.40×10 <sup>10</sup> | 24             | 46             | <sup>2</sup> |
| ZnO NRs/Cu <sub>2</sub> O                            | 425             | 25                               | 8.2                                     | -                     | 140            | 360            | <sup>3</sup> |
| Co <sub>3</sub> O <sub>4</sub> -ZnO                  | 520             |                                  | 8.3                                     | 3.14×10 <sup>12</sup> | 20             | 90             | <sup>4</sup> |
| FVO/NiO (This work)                                  | 445             | 6.5                              | 18                                      | 5.3×10 <sup>10</sup>  | 46             | 47             |              |
| Au/BiVO <sub>4</sub> /Pt                             | 520             | 150                              | 0.3                                     | 5×10 <sup>9</sup>     | 16.5           | 5.8            | <sup>5</sup> |
| Pt/LNO/Bi <sub>1.5</sub> FeO <sub>3</sub> /Au        | 500             | 0.2                              | 1.515                                   | 1.35×10 <sup>11</sup> | 6              | 15             | <sup>6</sup> |

## References

- (1) Li, Z.; Zhao, Y.; Li, W.; Peng, Y.; Zhao, W.; Wang, Z.; Shi, L.; Fei, W. *J. Mater. Chem. A* **2022**, *10*, 8772–8783.
- (2) Ashtar, M.; Marwat, M. A.; Li, Z.; Yang, Y.; Cao, D. *J. Lumin.* **2023**, *260*, 119855.
- (3) Bai, Z.; Zhang, Y. *J. Alloys Compd.* **2016**, *675*, 325–330.
- (4) Wang, H.; Wang, H.; Li, L.; Gu, Y.; Kim, B.-H.; Huang, J. *ACS Appl. Electron. Mater.* **2023**, *5*, 3224–3231.
- (5) Shi, L.; Li, Z.; Zhao, W.; Wang, Z.; Peng, Y.; Gao, C.; Hua, W.; Wang, J.; Yang, X.; Fei, W.; Zhao, Y. *Nano Energy* **2023**, *114*, 108594.
- (6) Li, Z.; Zhao, Y.; Li, W.; Zhao, W.; Wang, Z.; Peng, Y.; Shi, L.; Fei, W. *Ceram. Int.* **2022**, *48*, 2811–2819.
